# Supplementary material
Source: PubMed Central journal article supplement (PMC3491688)
Supplement: mmc1.pdf [file mmc1.pdf]

## Supporting Material

Water Permeability of Aquaporin-4 Channel Depends on Bilayer Composition, Thickness, and Elasticity

by

Jihong Tong, Margaret M. Briggs, and Thomas J. McIntosh

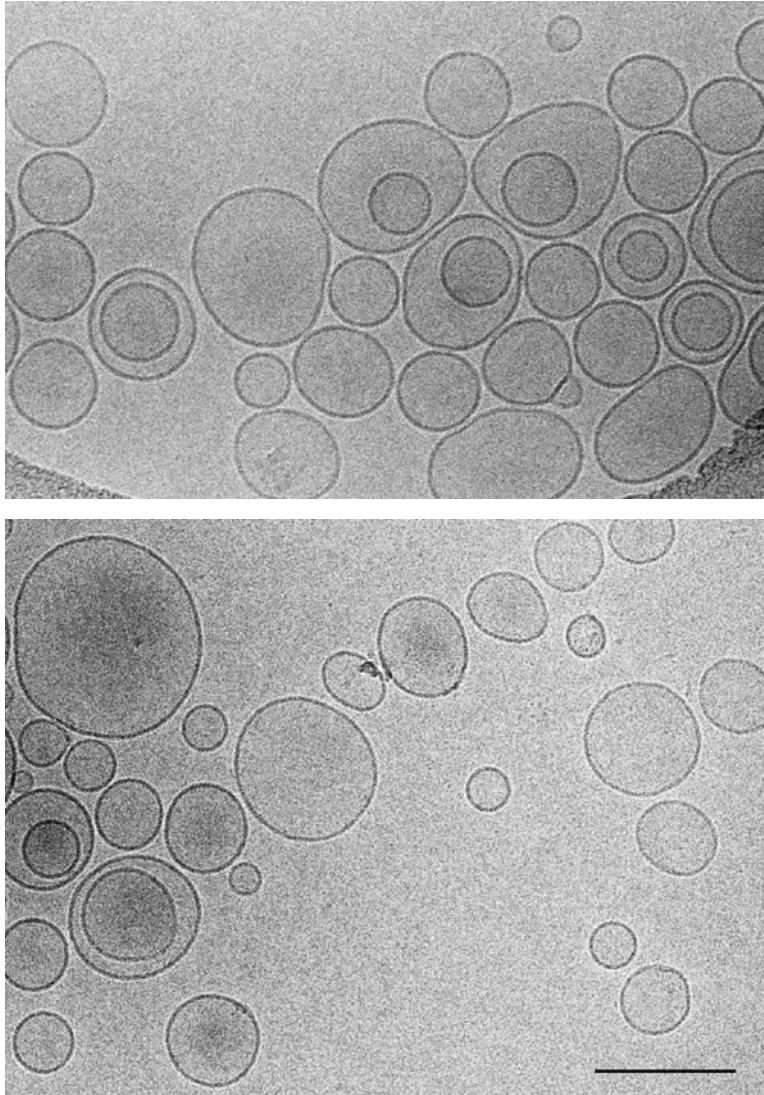

**Figure S1:** Cryo-transmission electron micrographs of SM:DPPG:cholesterol with no protein (top) or with AQP4-M1 (bottom) (protein/lipid ratio of 1/1500 M/M). Both micrographs were taken at the same magnification, with the bar in the lower right corner denoting 200 nm. Similar images were obtained with AQP4-M1 proteoliposomes containing POPC:POPG or POPC:POPG:cholesterol.

**Table S1**  
**Vesicle water permeabilities in absence of protein**

| <b>Lipid</b>                  | <b>This work<br/>P<sub>f</sub> (x10<sup>-3</sup> cm/sec)</b> | <b>Published values<br/>P<sub>f</sub> (x10<sup>-3</sup> cm/sec)</b> |
|-------------------------------|--------------------------------------------------------------|---------------------------------------------------------------------|
| POPC:POPG (8:2)               | 13.6±0.9                                                     | 13.0±0.4 <sup>a</sup><br>12.0±1.1 <sup>b</sup>                      |
| POPC:POPG:cholesterol (4:2:4) | 3.3±0.2                                                      | 2.9±0.6 <sup>c</sup>                                                |
| SM:DPPG:cholesterol (4:2:4)   | 0.3±0.1                                                      | 0.2±0.1 <sup>d</sup>                                                |

<sup>a</sup> POPC, Mathai, J. C., S. Tristram-Nagle, J. F. Nagle and M. L. Zeidel. 2008. Structural determinants of water permeability through the lipid membrane. *J Gen Physiol.* 131:69-76.

<sup>b</sup> POPC, Gensure, R. H., M. L. Zeidel and W. G. Hill. 2006. Lipid raft components cholesterol and sphingomyelin increase H<sup>+</sup>/OH<sup>-</sup> permeability of phosphatidylcholine membranes. *Biochem J.* 398:485-495.

<sup>c</sup> POPC:cholesterol (6.7:3.3), Gensure, R. H., M. L. Zeidel and W. G. Hill. 2006. Lipid raft components cholesterol and sphingomyelin increase H<sup>+</sup>/OH<sup>-</sup> permeability of phosphatidylcholine membranes. *Biochem J.* 398:485-495.

<sup>d</sup> SM:cholesterol (6:4), Lande, M. B., J. M. Donovan and M. L. Zeidel. 1995. The relationship between membrane fluidity and permeabilities to water, solutes, ammonia, and protons. *J Gen Physiol.* 106:67-84.

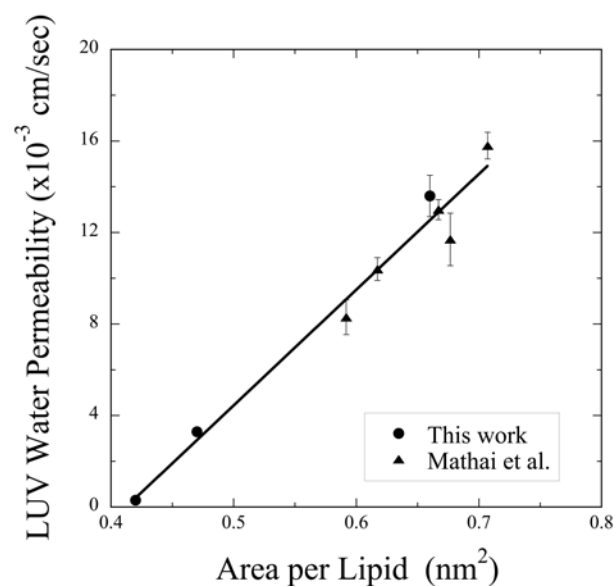

**Figure S2:** Average water permeability of control liposomes (LUVs) in the absence of protein plotted versus the area per lipid molecule ( $A_m$ ). The data of Mathai et al. (2008) are from single component PCs, in the order of increasing  $A_m$ : (C14:0)(C14:0)PC, (C12:0)(C12:0)PC, (C16:0)(C18:1)PC, (C22:1)(C22:1)PC, and (C18:1)(C18:1)PC, with a temperature adjustment so that all specimens are at 20 °C.
